# Supplementary material for: Identification of conserved, centrosome-targeting ASH domains in TRAPPII complex subunits and TRAPPC8
Source: PubMed Central journal article supplement (PMC4094338; doi:10.1186/2046-2530-3-6), 2014-06-18

Figure S1

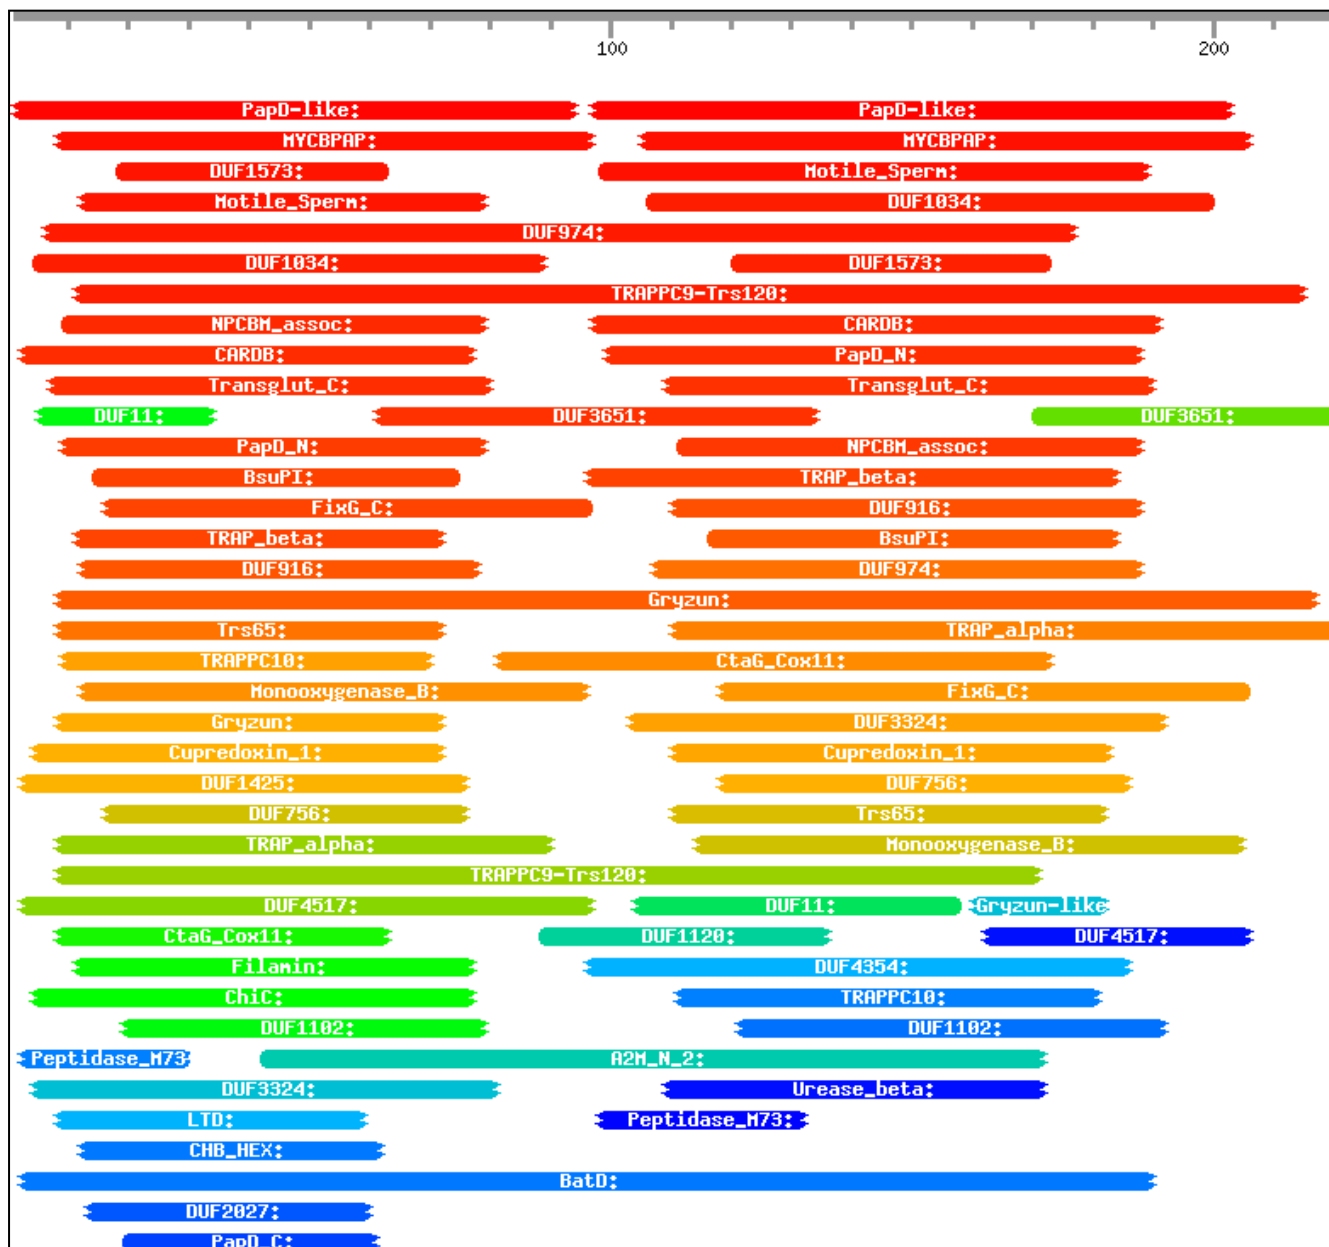

Supplement: 2046-2530-3-6-S1.pdf [file 2046-2530-3-6-S1.pdf]
